# Supplementary material for: Efficient Breeding by Genomic Mating
Source: PubMed Central journal article supplement (PMC5126051; doi:10.3389/fgene.2016.00210), 2016-11-29
Supplement: DataSheet1.pdf [file DataSheet1.pdf]

```

#####functins for applying breeding scheme (use of hypred and EMMREML
packages)
###Will not work without additional code from the corresponding
author.
breedingcycles.C0<-function(lambda, complexity, populationsize,
selectionintensity){

  library(hypred)
  N=populationsize

  genome <- hypredGenome(num.chr =3,
                        len.chr = rep(1,3), num.snp.chr=1000,
num.blocks.chr = 100)
  summary(genome)
  map <-slot(genome, "pos.snp")

  qtl.ids1 <- sort(sample(1:1000, complexity))
  qtl.ids2 <- sort(sample(1001:2000, complexity))
  qtl.ids3 <- sort(sample(2001:3000, complexity))

  qtl.ids<-c(qtl.ids1, qtl.ids2, qtl.ids3)
  qtl.dom.ids <- sort(c(sample(qtl.ids1, ceiling(complexity*.1)),
                        sample(qtl.ids2, ceiling(complexity*.1)) ,
                        sample(qtl.ids3, ceiling(complexity*.1)) ))
  per.mar.ids <- qtl.ids
  genome <- hypredNewQTL(genome,
                        new.id.add = qtl.ids,
                        new.id.dom = qtl.dom.ids,
                        new.id.per.mar = per.mar.ids,
                        new.eff.add = sqrt(1/(.
9*length(qtl.ids)))*rnorm(length(qtl.ids)),
                        new.eff.dom = sqrt(1/(.
1*length(qtl.ids)))*rnorm(length(qtl.dom.ids))
)
  summary(genome)

  founders<-hypredFounder(genome,
                          prob.snp = 1)
  founder1 <- founders[1,]#hypredFounder(genome,prob.snp = 1)[1, ]
  founder2 <- founders[2,]#hypredFounder(genome,prob.snp = 1)[2, ]

  F2 <- matrix(nrow = N * 2,ncol = 3000)

```

```

for(i in 1:(N*2))
{
  F2[i, ] <- hypredRecombine(genome,
                             genomeA = founder1,
                             genomeB = founder2,
                             mutate = TRUE,
                             mutation.rate.snp = 2.5 * 10^-5,
                             mutation.rate.qtl = 2.5 * 10^-5,
                             block = sample(c(TRUE,FALSE), 1))
}

```

```

design.M<- hypredCode(genome,
                     genotypes = F2,
                     DH = FALSE,
                     type = "012")

```

#####F3 is obtained by selfing F2

```

F3 <- F2 ## identical to the F2 at start
F3.temp <- matrix(nrow = N*2, ncol = 3000)

```

```

gameteIndex1 <- 1 ## indexing variables
gameteIndex2 <- 2
for(indiv in 1 : N) ## loop over individuals
{
  ## gamete 1
  F3.temp[gameteIndex1,] <-
    hypredRecombine(genome,
                    genomeA = F3[gameteIndex1,],
                    genomeB = F3[gameteIndex2,],
                    mutate = TRUE,
                    mutation.rate.snp = 2.5 * 10^(-5),
                    mutation.rate.qtl = 2.5 * 10^(-5),
                    block = sample(c(TRUE,FALSE), 1))

  ## gamete 2
  F3.temp[gameteIndex2,] <-
    hypredRecombine(genome,
                    genomeA = F3[gameteIndex1,],
                    genomeB = F3[gameteIndex2,],
                    mutate = TRUE,
                    mutation.rate.snp = 2.5 * 10^(-5),
                    mutation.rate.qtl = 2.5 * 10^(-5),
                    block = sample(c(TRUE,FALSE), 1))

  ## increment to next individual
  gameteIndex1 <- gameteIndex1 + 2
}

```

```

    gameteIndex2 <- gameteIndex2 + 2
  } ## end for N
## permutate
F3 <- F3.temp

design.M3<- hypredCode(genome,
                      genotypes = F3,
                      DH = FALSE,
                      type = "012")

#####Generate Phenotype and Genotype data
#####Build marker based model, estimate marker effects
g.value <- hypredTruePerformance(genome,
                                 F3,DH=FALSE)
var.env <- var(g.value)
phen.value <- g.value + rnorm(N, 0, sqrt(lambda)*sqrt(var.env))

library(EMMREML)

model<-emmreml(y=phen.value, X=matrix(1,
nrow=length(phen.value),ncol=1), Z=design.M3-1,
K=diag(ncol(design.M3)))
model$uhat
#####Phenotypic selection

index.individuals <- which(phen.value >= quantile(phen.value, 1-.8))
llindex<-.01
while (length(index.individuals)<10){
  index.individuals <- which(phen.value >= quantile(phen.value, 1-
(.8+llindex)))
  llindex=llindex+.01
}
selected<-c()
for (i in 1:length(index.individuals)){
  index.row1 <- index.individuals[i] * 2 - 1
  index.row2 <- index.individuals[i] * 2
  selected <- rbind(selected,F3[c(index.row1, index.row2), ])
}
Npar<-length(index.individuals)
#print(Npar)

```

```

#####Initial Population from selected parents
S1 <- matrix(nrow = N*2, ncol = 3000) ## identical to the F2 at
start
S1.temp <- matrix(nrow = N*2, ncol = 3000)

gameteIndex1 <- 1 ## indexing variables
gameteIndex2 <- 2
for(indiv in 1 : N) ## loop over individuals
{
  ## gamete 1
  par1<-sample(seq(1, (Npar*2), by=2), 1)
  par2<-sample(seq(1, (Npar*2), by=2), 1)
  S1.temp[gameteIndex1,] <-
    hybredRecombine(genome,
                    genomeA = selected[par1,],
                    genomeB = selected[par1+1,],
                    mutate = TRUE,
                    mutation.rate.snp = 2.5 * 10(-5),
                    mutation.rate.qtl = 2.5 * 10(-5),
                    block = sample(c(TRUE,FALSE), 1))

  ## gamete 2
  S1.temp[gameteIndex2,] <-
    hybredRecombine(genome,
                    genomeA = selected[par2,],
                    genomeB = selected[par2+1,],
                    mutate = TRUE,
                    mutation.rate.snp = 2.5 * 10(-5),
                    mutation.rate.qtl = 2.5 * 10(-5),
                    block = sample(c(TRUE,FALSE), 1))

  ## increment to next individual
  gameteIndex1 <- gameteIndex1 + 2
  gameteIndex2 <- gameteIndex2 + 2
} ## end for N

S1 <- S1.temp

design.S1<- hybredCode(genome,
                      genotypes = S1,
                      DH = FALSE,
                      type = "012")
return(list(genome=genome, gametes=S1, markermatrix=design.S1,
model=model, var.env=var.env))
}

```

```

breedingcycles.C1PS<-function(initpop, selectionintensity=.1, var.env,

```

```

lambda){

S2 <- initpop$gametes## identical to the F2 at start
genome<-initpop$genome
N<-nrow(S2)/2
nmarkers<-ncol(S2)
S2.temp <- matrix(nrow = N*2, ncol = nmarkers)

gameteIndex1 <- 1 ## indexing variables
gameteIndex2 <- 2
for(indiv in 1 : N) ## loop over individuals
{
  ## gamete 1
  S2.temp[gameteIndex1,] <-
    hypredRecombine(genome,
                    genomeA = S2[gameteIndex1,],
                    genomeB = S2[gameteIndex2,],
                    mutate = TRUE,
                    mutation.rate.snp = 2.5 * 10(-5),
                    mutation.rate.qtl = 2.5 * 10(-5),
                    block = sample(c(TRUE,FALSE), 1))

  ## gamete 2
  S2.temp[gameteIndex2,] <-
    hypredRecombine(genome,
                    genomeA = S2[gameteIndex1,],
                    genomeB = S2[gameteIndex2,],
                    mutate = TRUE,
                    mutation.rate.snp = 2.5 * 10(-5),
                    mutation.rate.qtl = 2.5 * 10(-5),
                    block = sample(c(TRUE,FALSE), 1))

  ## increment to next individual
  gameteIndex1 <- gameteIndex1 + 2
  gameteIndex2 <- gameteIndex2 + 2
} ## end for N
## permuate
S2 <- S2.temp

#####Generate Phenotype and Genotype data
#####Build marker based model, estimate marker effects
g.value <- hypredTruePerformance(genome,
                                S2,DH=FALSE)
phen.value <- g.value + rnorm(N, 0, sqrt(lambda)*sqrt(var.env))

```



```

## gamete 2
S1.temp[gameteIndex2,] <-
  hypredRecombine(genome,
                  genomeA = selected[par2,],
                  genomeB = selected[par2+1,],
                  mutate = TRUE,
                  mutation.rate.snp = 2.5 * 10^(-5),
                  mutation.rate.qtl = 2.5 * 10^(-5),
                  block = sample(c(TRUE,FALSE), 1))
## increment to next individual
gameteIndex1 <- gameteIndex1 + 2
gameteIndex2 <- gameteIndex2 + 2
} ## end for N

S1 <- S1.temp

design.S1<- hypredCode(genome,
                     genotypes = S1,
                     DH = FALSE,
                     type = "012")

return(list(genome=genome, gametes=S1,markermatrix=design.S1,
model=model))
}

```

```

breedingcycles.C1GS<-function(initpop, selectionintensity=.
1,modelupdate=T, var.env, lambda){

```

```

S2 <- initpop$gametes## identical to the F2 at start
genome<-initpop$genome
model<-initpop$model
N<-nrow(S2)/2
nmarkers<-ncol(S2)
design.S2<- hypredCode(genome,
                      genotypes = S2,
                      DH = FALSE,
                      type = "012")

```

```

GEBVsS2<-(design.S2-1)%*%model$uhat

```

```

#####Genomic selection

```

```

index.individuals <- which(GEBVsS2 >= quantile(GEBVsS2, 1-
selectionintensity))

llindex<-.01
while (length(index.individuals)<10){
  index.individuals <- which(GEBVsS2 >= quantile(GEBVsS2, 1-
(selectionintensity+llindex)))

  llindex=llindex+.01
}

selected<-c()
for (i in 1:length(index.individuals)){
  index.row1 <- index.individuals[i] * 2 - 1
  index.row2 <- index.individuals[i] * 2
  selected <- rbind(selected,S2[c(index.row1, index.row2), ])
}
Npar<-length(index.individuals)
#print(Npar)

#####Initial Population from selected parents
S1 <- matrix(nrow = N*2, ncol = nmarkers) ## identical to the F2 at
start
S1.temp <- matrix(nrow = N*2, ncol = nmarkers)

gameteIndex1 <- 1 ## indexing variables
gameteIndex2 <- 2
for(indiv in 1 : N) ## loop over individuals
{
  ## gamete 1
  par1<-sample(seq(1,(Npar*2)),by=2),1)
  par2<-sample(seq(1,(Npar*2)),by=2),1)
  S1.temp[gameteIndex1,] <-
    hypredRecombine(genome,
                    genomeA = selected[par1,],
                    genomeB = selected[par1+1,],
                    mutate = TRUE,
                    mutation.rate.snp = 2.5 * 10(-5),
                    mutation.rate.qtl = 2.5 * 10(-5),
                    block = sample(c(TRUE,FALSE), 1))

  ## gamete 2
  S1.temp[gameteIndex2,] <-
    hypredRecombine(genome,
                    genomeA = selected[par2,],
                    genomeB = selected[par2+1,],
                    mutate = TRUE,
                    mutation.rate.snp = 2.5 * 10(-5),
                    mutation.rate.qtl = 2.5 * 10(-5),

```



```

        block = sample(c(TRUE,FALSE), 1))
    ## increment to next individual
    gameteIndex1 <- gameteIndex1 + 2
    gameteIndex2 <- gameteIndex2 + 2
} ## end for N

S1 <- S1.temp

design.S1<- hypredCode(genome,
                      genotypes = S1,
                      DH = FALSE,
                      type = "012")
if (modelupdate){
    #####Generate Phenotype and Genotype data
    #####Build marker based model, estimate marker effects
    g.value <- hypredTruePerformance(genome,
                                     S1,DH=FALSE)

    phen.value <- g.value + rnorm(N, 0, sqrt(lambda)*sqrt(var.env))

    library(EMMREML)
    print((design.S1-1)[1:5,1:5])
    model<-emmreml(y=phen.value, X=matrix(1,
nrow=length(phen.value),ncol=1), Z=design.S1-1,
K=diag(ncol(design.S1)))
}
    return(list(genome=genome, gametes=S1,markermatrix=design.S1,
model=model))
}

#####

#####

breedingcycles.C1GSMatingStrategy<-
function(initpop,impvar,impforinbreed,minparents,
impinbreedstepsize,modelupdate, var.env, lambda,npopGA, nitGA,
plotiters , mc.cores, nelite, mutprob){

```

```
#####Cycle (by selfing s1)
#####Generate Phenotype and Genotype data
#####Build marker based model, estimate marker effects
#####Phenotypic selection
```

```
S2 <- initpop$gametes## identical to the F2 at start
genome<-initpop$genome
model<-initpop$model
N<-nrow(S2)/2
nmarkers<-ncol(S2)
design.S2<- hypredCode(genome,
                      genotypes = S2,
                      DH = FALSE,
                      type = "012")
Amat2<-Kmatfunc( design.S2-1)
GEBVsS2<-(design.S2-1)%*%model$uhat
```

```
solGA<-getGaSolutions(design.S2-1, Amat2, model$uhat,
impvar=impvar, impforinbreed=impforinbreed,minparents=minparents,
impinbreedstepsize=impinbreedstepsize,npopGA=npopGA, nitGA=nitGA,
plotiters=plotiters, mc.cores=mc.cores,nelite=nelite, mutprob=mutprob)
```

```
#####Initial Population from selected parents
S1 <- matrix(nrow = N*2, ncol = nmarkers) ## identical to the F2 at
start
S1.temp <- matrix(nrow = N*2, ncol = nmarkers)
#print(solGA)
#print(order(GEBVsS2, decreasing=T))
gameteIndex1 <- 1 ## indexing variables
gameteIndex2 <- 2
for(indiv in 1 : N) ## loop over individuals
{
  ## gamete 1
  par1<-2*solGA[indiv,1]-1
  par2<-2*solGA[indiv,2]-1
  # print(c(par1,par2))
  S1.temp[gameteIndex1,] <-
    hypredRecombine(genome,
                    genomeA = S2[par1,],
                    genomeB = S2[par1+1,],
                    mutate = TRUE,
                    mutation.rate.snp = 2.5 * 10^(-5),
                    mutation.rate.qtl = 2.5 * 10^(-5),
                    block = sample(c(TRUE,FALSE), 1))

  ## gamete 2
  S1.temp[gameteIndex2,] <-
    hypredRecombine(genome,
```

```

        genomeA = S2[par2,],
        genomeB = S2[par2+1,],
        mutate = TRUE,
        mutation.rate.snp = 2.5 * 10(-5),
        mutation.rate.qtl = 2.5 * 10(-5),
        block = sample(c(TRUE,FALSE), 1))
    ## increment to next individual
    gameteIndex1 <- gameteIndex1 + 2
    gameteIndex2 <- gameteIndex2 + 2
} ## end for N

S1 <- S1.temp

design.S1<- hypredCode(genome,
                      genotypes = S1,
                      DH = FALSE,
                      type = "012")
if (modelupdate){
    #####Generate Phenotype and Genotype data
    #####Build marker based model, estimate marker effects
    g.value <- hypredTruePerformance(genome,
                                     S1,DH=FALSE)
    phen.value <- g.value + rnorm(N, 0, sqrt(lambda)*sqrt(var.env))

    library(EMMREML)

    model<-emmreml(y=phen.value, X=matrix(1,
nrow=length(phen.value),ncol=1), Z=design.S1-1,
K=diag(ncol(design.S1)))
}
return(list(genome=genome, gametes=S1,markermatrix=design.S1,
model=model, solGA=solGA))
}

breedingcycles.C1GSEFF0<-function(initpop, qcut,modelupdate=T,
var.env, lambda){

#####Cycle (by selfing s1)
#####Generate Phenotype and Genotype data
#####Build marker based model, estimate marker effects
#####Phenotypic selection

S2 <- initpop$gametes## identical to the F2 at start
genome<-initpop$genome

```

```

model<-initpop$model
N<-nrow(S2)/2
nmarkers<-ncol(S2)
design.S2<- hypredCode(genome,
                      genotypes = S2,
                      DH = FALSE,
                      type = "012")

GEBVsS2<-(design.S2-1)%*%model$uhat

Amat2<-Kmatfunc( design.S2-1)
colnames(Amat2)<-rownames(Amat2)<-names(GEBVsS2)<-paste("l",
1:length(GEBVsS2),sep="")

eigAmat2<-eigen(Amat2, symmetric=T)
eigAmat2$values[eigAmat2$values<1e-6]<-1e-6
Amat2<- eigAmat2$vectors%*%diag(eigAmat2$values)%*
%t(eigAmat2$vectors)
colnames(Amat2)<-rownames(Amat2)<-names(GEBVsS2)<-paste("l",
1:length(GEBVsS2),sep="")

outefffront<- efficientfrontier(Amat=Amat2, gebvs=GEBVsS2,
ul=1,npointsforefffront=npointsforefffront)

maxret<-max(outefffront[,N+2])
minret<-min(outefffront[,N+2])
minpoint<-which.min(abs(qcut*(maxret-minret)+minret-outefffront[,N
+2]))
impforbreedest<-outefffront[minpoint,N+1]
eff.optimal.point <-outefffront[minpoint,1:N]

index.individuals <- which(GEBVsS2 >= quantile(GEBVsS2, 0))
selected<-c()
for (i in 1:length(index.individuals)){
  index.row1 <- index.individuals[i] * 2 - 1
  index.row2 <- index.individuals[i] * 2
  selected <- rbind(selected,S2[c(index.row1, index.row2), ])
}
Npar<-length(index.individuals)

# print(length(eff.optimal.point[eff.optimal.point>0]))
#####Initial Population from selected parents
S1 <- matrix(nrow = N*2, ncol = nmarkers) ## identical to the F2 at
start
S1.temp <- matrix(nrow = N*2, ncol = nmarkers)

gameteIndex1 <- 1 ## indexing variables
gameteIndex2 <- 2
for(indiv in 1 : N) ## loop over individuals

```

```

{
  ## gamete 1

  par1<-sample(seq(1, (Npar*2), by=2), size=1, prob=eff.optimal.point)
  par2<-sample(seq(1, (Npar*2), by=2), size=1, prob=eff.optimal.point)
  S1.temp[gameteIndex1,] <-
    hybredRecombine(genome,
      genomeA = selected[par1,],
      genomeB = selected[par1+1,],
      mutate = TRUE,
      mutation.rate.snp = 2.5 * 10(-5),
      mutation.rate.qtl = 2.5 * 10(-5),
      block = sample(c(TRUE,FALSE), 1))

  ## gamete 2
  S1.temp[gameteIndex2,] <-
    hybredRecombine(genome,
      genomeA = selected[par2,],
      genomeB = selected[par2+1,],
      mutate = TRUE,
      mutation.rate.snp = 2.5 * 10(-5),
      mutation.rate.qtl = 2.5 * 10(-5),
      block = sample(c(TRUE,FALSE), 1))

  ## increment to next individual
  gameteIndex1 <- gameteIndex1 + 2
  gameteIndex2 <- gameteIndex2 + 2
} ## end for N

S1 <- S1.temp

design.S1<- hybredCode(genome,
  genotypes = S1,
  DH = FALSE,
  type = "012")

if (modelupdate){
  #####Generate Phenotype and Genotype data
  #####Build marker based model, estimate marker effects
  g.value <- hybredTruePerformance(genome,
    S1,DH=FALSE)
  phen.value <- g.value + rnorm(N, 0, sqrt(lambda)*sqrt(var.env))

  library(EMMREML)

  model<-emmreml(y=phen.value, X=matrix(1,
nrow=length(phen.value),ncol=1), Z=design.S1-1,
K=diag(ncol(design.S1)))
}
return(list(genome=genome, gametes=S1,markermatrix=design.S1,
model=model,prob=eff.optimal.point))

```

}
